# Supplementary material for: Clinical Outcomes of FLACS with Crater phaco-chop Technique for Grade 5 Leathery Brown Nuclear Cataracts
Source: Research Square preprint supplement (doi:10.21203/rs.3.rs-5369807/v1), 2024-12-18
Supplement: Supplementary file 1 [file 736ddd065bc3357447d1a23e.xlsx]

## Sheet: FLACE+crater
NO.	Sex	Eye	Age	Complication	CDE	Pre-UDVA	Pre-UDVA-LogMAR	Pre-CDVA	Pre-CDVA-LogMAR	Pre-IOP	Pre-ECD	Pre-CCT	Post-UDVA	Post-UDVA-LogMAR	Post-CDVA	Post-CDVA-LogMAR	Post-IOP	Post-CCT	Post-1w-UDVA	Post-1w-UDVA-LogMAR	Post-1w-CDVA	Post-1w-CDVA-LogMAR	Post-1w-IOP	Post-1w-ECD	1w-ECD-LOST	Post-1w-CCT	Post-1m-UDVA	Post-1m-UDVA-LogMAR	Post-1m-CDVA	Post-1m-CDVA-LogMAR	Post-1m-IOP	Post-1m-ECD	1m-ECD-LOST	Post-1m-CCT	Post-3m-UDVA	Post-3m-UDVA-LogMAR	Post-3m-CDVA	Post-3m-CDVA-LogMAR	Post-3m-IOP	Post-3m-ECD	3m-ECD-LOST	Post-3m-CCT
1	F	OD	79	No	39.84	CF	CF	CF	CF	18	1834.4	556	0.12	0.920819	0.4	0.39794	23.7	681	0.12	0.920819	0.6	0.221849	13	1404.2	0.234518	592	0.2	0.69897	0.5	0.30103	15.3	1530.7	0.165558	573	0.2	0.69897	0.6	0.221849	18.4	1774.2	0.0328173	554
2	F	OD	69	No	40.92	CF/20cm	CF/20cm	CF/20cm	CF/20cm	16.8	2844	548	0.1	1	0.3	0.522879	16	679	0.2	0.69897	0.3	0.522879	15.3	1949.2	0.314627	562	0.3	0.522879	0.4	0.39794	16.3	2103.4	0.260408	563	0.3	0.522879	0.4	0.39794	14.2	2193.9	0.228586	549
3	M	OS	77	No	43.72	HM/40cm	HM/40cm	HM/40cm	HM/40cm	13	3135.9	523	0.1	1	0.3	0.522879	23.7	669	0.3	0.522879	0.4	0.39794	16	2183.4	0.303741	542	0.3	0.522879	0.5	0.30103	14.5	2275.1	0.274499	534	0.25	0.60206	0.6	0.221849	12.5	2298.1	0.267164	533
4	M	OD	71	No	45.12	HM	HM	HM	HM	13	2967.9	517	0.3	0.522879	0.4	0.39794	13.7	782	0.5	0.30103	0.5	0.30103	16.3	2294.2	0.226996	655	0.6	0.221849	0.6	0.221849	15.2	2327.7	0.215708	542	0.6	0.221849	0.6	0.221849	15.3	2439.5	0.178038	521
5	F	od	80	No	39.42	CF/10cm	CF/10cm	CF/10cm	CF/10cm	15.3	2493.8	540	0.25	0.60206	0.4	0.39794	17.5	672	0.3	0.522879	0.6	0.221849	14.5	1969.5	0.210241	573	0.4	0.39794	0.6	0.221849	16.2	2043.6	0.180528	563	0.4	0.39794	0.6	0.221849	15.9	2209.1	0.114163	549
6	F	os	80	No	44.21	CF/10cm	CF/10cm	CF/10cm	CF/10cm	12.3	2501.6	557	0.15	0.823909	0.4	0.39794	23	702	0.4	0.39794	0.5	0.30103	11.4	2003.4	0.199153	647	0.4	0.39794	0.5	0.30103	11.8	2099.8	0.160617	579	0.3	0.522879	0.5	0.30103	12.3	2278.3	0.0892629	550
7	M	od	76	No	42.39	HM/40cm	HM/40cm	HM/40cm	HM/40cm	15	2756.5	554	0.3	0.522879	0.4	0.39794	12.7	622	0.4	0.39794	0.6	0.221849	16.3	2234.2	0.189479	594	0.5	0.30103	0.6	0.221849	16.2	2294.1	0.167749	582	0.5	0.30103	0.6	0.221849	14.3	2309.5	0.162162	561
8	M	OD	71	No	42.28	CF	CF	CF	CF	12.2	3012.4	549	0.1	1	0.1	1	12	725	0.4	0.39794	0.5	0.30103	11.4	2215.2	0.264639	553	0.5	0.30103	0.6	0.221849	10.9	2395.3	0.204853	550	0.6	0.221849	0.6	0.221849	12.1	2509.2	0.167043	558
9	F	os	78	No	41.98	0.1	1	0.15	0.823909	11.7	2089.8	555	0.2	0.69897	0.3	0.522879	10.1	689	0.25	0.60206	0.3	0.522879	14.3	1622.4	0.223658	569	0.4	0.39794	0.5	0.30103	13.2	1803.4	0.137047	560	0.5	0.30103	0.6	0.221849	12.9	1900.7	0.0904871	558
10	F	os	76	No	44.82	HM	HM	HM	3	10	2700.6	484	0.3	0.522879	0.5	0.30103	13	657	0.4	0.39794	0.5	0.30103	11	1987.3	0.264126	502	0.5	0.30103	0.6	0.221849	11.3	2101.2	0.221951	498	0.5	0.30103	0.6	0.221849	13.9	2273.6	0.158113	491
11	M	OD	83	No	39.96	HM/40cm	HM/40cm	HM/40cm	3	11.5	2822.3	559	0.2	0.69897	0.5	0.30103	15.3	689	0.5	0.30103	0.6	0.221849	14.2	2045.2	0.275343	589	0.6	0.221849	0.6	0.221849	13.2	2145.9	0.239663	572	0.6	0.221849	0.6	0.221849	15.2	2293.1	0.187507	553
12	F	OD	69	No	45.72	HM	HM	HM/40cm	3	10.2	2014.8	564	0.5	0.30103	0.6	0.221849	19.7	751	0.6	0.221849	0.6	0.221849	11.3	1620.3	0.195801	583	0.6	0.221849	0.8	0.09691	13.8	1732.9	0.139915	570	0.8	0.09691	0.8	0.09691	11.8	1795.9	0.108646	567
13	F	OS	93	No	43.89	HM	HM	HM	3	12.3	2577.2	515	0.2	0.69897	0.25	0.60206	12.5	748	0.5	0.30103	0.8	0.09691	10.5	1873.4	0.273087	645	0.6	0.221849	0.8	0.09691	14.8	1912.9	0.25776	547	0.6	0.221849	0.8	0.09691	16.8	2102.4	0.184231	520
14	M	OS	53	No	43.28	0.05	1.30103	0.05	1.30103	17	2845.4	548	0.1	1	0.3	0.522879	19.3	726	0.15	0.823909	0.6	0.221849	15.6	1899.3	0.332502	648	0.15	0.823909	0.6	0.221849	16.7	1903.4	0.331061	592	0.15	0.823909	0.6	0.221849	12.1	2205.1	0.22503	590
			75.3571		42.6821				2.35416	13.45	2614.04	540.643	0.208571	0.736669	0.367857	0.464799	16.5857	699.429	0.358571	0.486301	0.528571	0.29113	13.65	1950.09	0.250565	589.571	0.432143	0.396639	0.585714	0.239202	14.2429	2047.81	0.211237	558.929	0.45	0.389717	0.607143	0.222234	14.1214	2184.47	0.156661	546.714
			9.00946		2.05585				1.01185	2.54642	392.627	22.677	0.114479	0.226712	0.123424	0.186834	4.62715	42.6537	0.143947	0.209069	0.132599	0.11953	2.15826	257.218	0.0461479	45.4562	0.151413	0.18718	0.109945	0.0799474	1.9318	247.301	0.0568397	23.8536	0.188108	0.212464	0.0997249	0.0725869	2.00545	221.059	0.0636925	24.059

## Sheet: FLACE
NO.	Sex	Eye	Age	Complication	CDE	Pre-UDVA	Pre-UDVA-LogMAR	Pre-CDVA	Pre-CDVA-LogMAR	Pre-IOP	Pre-ECD	Pre-CCT	Post-UDVA	Post-UDVA-LogMAR	Post-CDVA	Post-CDVA-LogMAR	Post-IOP	Post-CCT	Post-1w-UDVA	Post-1w-UDVA-LogMAR	Post-1w-CDVA	Post-1w-CDVA-LogMAR	Post-1w-IOP	Post-1w-ECD	1w-ECD-LOST	Post-1w-CCT	Post-1m-UDVA	Post-1m-UDVA-LogMAR	Post-1m-CDVA	Post-1m-CDVA-LogMAR	Post-1m-IOP	Post-1m-ECD	1m-ECD-LOST	Post-1m-CCT	Post-3m-UDVA	Post-3m-UDVA-LogMAR	Post-3m-CDVA	Post-3m-CDVA-LogMAR	Post-3m-IOP	Post-3m-ECD	3m-ECD-LOST	Post-3m-CCT
1	M	OD	85	anterior capsule tear	48.92	0.1	1	0.1	1	12.9	3306.9	498	0.05	1.30103	0.3	0.522879	16.3	803	0.3	0.522879	0.6	0.221849	13.4	2284.6	0.309141	642	0.4	0.39794	0.6	0.221849	12.5	2392.1	0.276634	523	0.4	0.39794	0.6	0.221849	13.6	2435.2	0.2636	519
2	M	OS	90		43.32	HM	HM	HM	HM	10	2266.8	606	0.1	1	0.3	0.522879	15.7	785	0.2	0.69897	0.4	0.39794	11.3	1599.5	0.29438	634	0.2	0.69897	0.6	0.221849	11.9	1692.3	0.253441	618	0.2	0.69897	0.7	0.154902	10.5	1800.2	0.205841	610
3	F	OD	84		46.29	CF	CF	CF	CF	14.6	2494	490	0.2	0.69897	0.3	0.522879	12	670	0.3	0.522879	0.5	0.30103	13.2	1773.2	0.289014	532	0.3	0.522879	0.6	0.221849	14.1	1894.3	0.240457	512	0.4	0.39794	0.6	0.221849	13.5	1954.3	0.216399	509
4	F	OD	61		42.87	CF	CF	HM	HM	15.6	2343.8	541	0.1	1	0.3	0.522879	19.7	711	0.4	0.39794	0.6	0.221849	15.7	1694.9	0.276858	592	0.5	0.30103	0.6	0.221849	13.7	1794.6	0.23432	583	0.5	0.30103	0.6	0.221849	14.2	2083.7	0.110974	553
5	M	os	61		42.84	CF	CF	HM	HM	16.9	2556.3	542	0.05	1.30103	0.2	0.69897	7.1	722	0.6	0.221849	0.6	0.221849	16.8	2010.3	0.21359	612	0.6	0.221849	0.8	0.09691	17.4	2064.3	0.192466	598	0.6	0.221849	0.8	0.09691	16.3	2113.5	0.173219	563
6	M	OS	65	anterior capsule tear	46.25	CF	CF	HM	HM	16.3	2793.5	540	0.1	1	0.3	0.522879	15	809	0.2	0.69897	0.3	0.522879	17.3	1913.5	0.315017	618	0.25	0.60206	0.4	0.39794	18.2	1983.2	0.290066	587	0.3	0.522879	0.5	0.30103	19.8	2019.6	0.277036	562
7	F	OD	80		43.84	LP	LP	LP	LP	10.1	2471.7	530	0.3	0.522879	0.4	0.39794	8	723	0.4	0.39794	0.6	0.221849	10	1823.4	0.262289	593	0.5	0.30103	0.5	0.30103	11.2	1964.7	0.205122	573	0.5	0.30103	0.5	0.30103	12.1	2204.3	0.108185	552
8	F	OS	69		43.27	0.02	1.69897	0.02	1.69897	14.6	2208.9	542	0.3	0.522879	0.3	0.522879	16.9	706	0.2	0.69897	0.6	0.221849	12.5	1690.2	0.234823	573	0.3	0.522879	0.6	0.221849	13.2	1703.2	0.228937	587	0.25	0.60206	0.6	0.221849	11.3	1830.5	0.171307	558
9	M	OS	65		43.76	HM	HM	HM	HM	10	3639.7	555	0.1	1	0.2	0.69897	16	713	0.2	0.69897	0.4	0.39794	9.8	2354.1	0.353216	583	0.3	0.522879	0.6	0.221849	11.2	2467.9	0.32195	572	0.3	0.522879	0.6	0.221849	10.9	2603.9	0.284584	561
10	F	OS	79		45.38	0.01	2	0.02	1.69897	12.5	2656.1	516	0.2	0.69897	0.3	0.522879	12.7	739	0.3	0.522879	0.3	0.522879	14.2	1834.2	0.309439	569	0.5	0.30103	0.6	0.221849	15.2	1932.7	0.272354	527	0.5	0.30103	0.6	0.221849	16.1	2083.1	0.21573	510
11	M	OD	84		43.97	CF	CF	CF	CF	14.5	2581.9	572	0.3	0.522879	0.5	0.30103	15.3	662	0.3	0.522879	0.5	0.30103	15.2	1799.2	0.303149	603	0.6	0.221849	0.6	0.221849	16.2	1840.9	0.286998	601	0.6	0.221849	0.8	0.09691	15.3	1924.3	0.254696	573
12	M	OD	53	posterior capsule rupture	58.52	HM/20cm	HM/20cm	HM/20cm	HM/20cm	19.7	2969.1	523	0.05	1.30103	0.1	1	25	889	0.3	0.522879	0.4	0.39794	15.8	2083.4	0.298306	609	0.4	0.39794	0.6	0.221849	15.7	2110.8	0.289077	561	0.4	0.39794	0.6	0.221849	14.2	2234.8	0.247314	560
13	F	OD	77		44.49	CF	CF	CF	CF	12.7	2664.9	515	0.4	0.39794	0.5	0.30103	12	732	0.5	0.30103	0.6	0.221849	20.1	1892.1	0.289992	607	0.5	0.30103	0.5	0.30103	12.5	1942.7	0.271005	543	0.6	0.221849	0.6	0.221849	11.5	2188.9	0.178618	536
			73.3077		45.6708		1.56632		1.46598	13.8769	2688.74	536.154	0.173077	0.866739	0.307692	0.54293	14.7462	743.385	0.323077	0.517618	0.492308	0.320979	14.2538	1904.05	0.288401	597.462	0.411538	0.40872	0.584615	0.237965	14.0769	1983.36	0.258679	568.077	0.426923	0.393019	0.623077	0.209659	13.7923	2113.56	0.208269	551.231
			11.5714		4.23183		0.513027		0.403551	2.9138	410.173	30.6536	0.118349	0.325019	0.111516	0.182226	4.68003	62.713	0.123517	0.156718	0.118754	0.115128	2.98458	225.975	0.0358455	29.0964	0.13253	0.151983	0.0898717	0.068179	2.30259	233.857	0.0370423	32.9051	0.136344	0.153945	0.0926809	0.0621215	2.64527	227.787	0.058008	27.6259
